# Supplementary material for: Integrating humanoid robots with human musicians for synchronized musical performances
Source: PeerJ Comput Sci. 2025 Jan 3;11:e2632. doi: 10.7717/peerj-cs.2632 (PMC11784815; doi:10.7717/peerj-cs.2632)
Supplement: Supplemental Information 2 — Overall/average results for both songs based on their offset times and overall improvement in %. The averages are based on 10 plays as shown in the raw data. [file peerj-cs-11-2632-s002.xlsx]

## Sheet: Sheet1
	Performance Timing Experimental Results
		Offset time (seconds)**
		Knockin' on Heaven’s Door		The Glorious Years
	Plays	Without Syncronization	With Syncronization	Without Syncronization	With Syncronization
	1	3.24	0.3	3.86	0.3
	2	3.22	0.28	3.86	0.31
	3	3.23	0.28	3.86	0.32
	4	3.23	0.27	3.87	0.32
	5	3.24	0.27	3.87	0.3
	6	3.25	0.28	3.88	0.31
	7	3.25	0.26	3.86	0.31
	8	3.22	0.28	3.85	0.31
	9	3.22	0.28	3.87	0.31
	10	3.23	0.29	3.86	0.3
	Average	3.233	0.279	3.864	0.309
			Offset rate
		Length (second)*	Without Syncronization	Rate, %	With Syncronization	Rate,%
	Knockin' on Heaven’s Door	175	3.23	1.84571	0.28	0.16
	The Glorious Years	205	3.86	1.88293	0.31	0.15122
	Average	190	3.545	1.86432	0.295	0.15561
	* Length is based on Oscar's plays
	** Offset time is the delay time Polaris after Oscar completed the plays
