# Supplementary material for: Integrating humanoid robots with human musicians for synchronized musical performances
Source: PeerJ Comput Sci. 2025 Jan 3;11:e2632. doi: 10.7717/peerj-cs.2632 (PMC11784815; doi:10.7717/peerj-cs.2632)
Supplement: Supplemental Information 5 — The results consist of the success rate for Oscar’s keyboard visual serving experiment. [file peerj-cs-11-2632-s005.xlsx]

## Sheet: Raw_Sorted
Trial	Offset_Position	Success
5	x_n	TRUE
14	x_n	TRUE
23	x_n	TRUE
31	x_n	TRUE
33	x_n	TRUE
37	x_n	TRUE
41	x_n	TRUE
42	x_n	TRUE
44	x_n	TRUE
50	x_n	FALSE
52	x_n	TRUE
55	x_n	TRUE
62	x_n	TRUE
71	x_n	FALSE
92	x_n	TRUE
97	x_n	TRUE
98	x_n	TRUE
102	x_n	TRUE
104	x_n	TRUE
113	x_n	TRUE
3	x_p	TRUE
8	x_p	TRUE
11	x_p	TRUE
13	x_p	FALSE
18	x_p	TRUE
26	x_p	TRUE
27	x_p	TRUE
40	x_p	TRUE
47	x_p	TRUE
53	x_p	TRUE
57	x_p	TRUE
63	x_p	TRUE
66	x_p	TRUE
67	x_p	TRUE
69	x_p	TRUE
70	x_p	TRUE
73	x_p	TRUE
100	x_p	TRUE
103	x_p	TRUE
117	x_p	TRUE
6	y_n	TRUE
7	y_n	TRUE
12	y_n	TRUE
21	y_n	TRUE
24	y_n	TRUE
29	y_n	TRUE
32	y_n	TRUE
43	y_n	TRUE
49	y_n	TRUE
54	y_n	TRUE
59	y_n	TRUE
60	y_n	TRUE
74	y_n	TRUE
82	y_n	TRUE
84	y_n	TRUE
91	y_n	TRUE
95	y_n	TRUE
109	y_n	TRUE
114	y_n	TRUE
115	y_n	TRUE
1	y_p	TRUE
2	y_p	TRUE
4	y_p	TRUE
9	y_p	TRUE
22	y_p	TRUE
25	y_p	TRUE
35	y_p	TRUE
38	y_p	TRUE
51	y_p	TRUE
58	y_p	FALSE
77	y_p	TRUE
78	y_p	TRUE
80	y_p	FALSE
86	y_p	TRUE
87	y_p	TRUE
88	y_p	TRUE
90	y_p	TRUE
94	y_p	TRUE
101	y_p	TRUE
119	y_p	TRUE
10	z_n	TRUE
17	z_n	TRUE
20	z_n	TRUE
28	z_n	TRUE
36	z_n	TRUE
39	z_n	TRUE
56	z_n	TRUE
65	z_n	TRUE
72	z_n	TRUE
75	z_n	TRUE
83	z_n	TRUE
89	z_n	TRUE
93	z_n	TRUE
96	z_n	TRUE
99	z_n	TRUE
105	z_n	TRUE
108	z_n	TRUE
112	z_n	FALSE
116	z_n	TRUE
120	z_n	FALSE
15	z_p	TRUE
16	z_p	TRUE
19	z_p	TRUE
30	z_p	TRUE
34	z_p	TRUE
45	z_p	TRUE
46	z_p	TRUE
48	z_p	TRUE
61	z_p	TRUE
64	z_p	TRUE
68	z_p	TRUE
76	z_p	TRUE
79	z_p	TRUE
81	z_p	TRUE
85	z_p	TRUE
106	z_p	TRUE
107	z_p	TRUE
110	z_p	TRUE
111	z_p	TRUE
118	z_p	TRUE

## Sheet: Sucessful rate
Offset_Position	x_n	x_p	y_n	y_p	z_n	z_p
1	TRUE	TRUE	TRUE	TRUE	TRUE	TRUE
2	TRUE	TRUE	TRUE	TRUE	TRUE	TRUE
3	TRUE	TRUE	TRUE	TRUE	TRUE	TRUE
4	TRUE	FALSE	TRUE	TRUE	TRUE	TRUE
5	TRUE	TRUE	TRUE	TRUE	TRUE	TRUE
6	TRUE	TRUE	TRUE	TRUE	TRUE	TRUE
7	TRUE	TRUE	TRUE	TRUE	TRUE	TRUE
8	TRUE	TRUE	TRUE	TRUE	TRUE	TRUE
9	TRUE	TRUE	TRUE	TRUE	TRUE	TRUE
10	FALSE	TRUE	TRUE	FALSE	TRUE	TRUE
11	TRUE	TRUE	TRUE	TRUE	TRUE	TRUE
12	TRUE	TRUE	TRUE	TRUE	TRUE	TRUE
13	TRUE	TRUE	TRUE	FALSE	TRUE	TRUE
14	FALSE	TRUE	TRUE	TRUE	TRUE	TRUE
15	TRUE	TRUE	TRUE	TRUE	TRUE	TRUE
16	TRUE	TRUE	TRUE	TRUE	TRUE	TRUE
17	TRUE	TRUE	TRUE	TRUE	TRUE	TRUE
18	TRUE	TRUE	TRUE	TRUE	FALSE	TRUE
19	TRUE	TRUE	TRUE	TRUE	TRUE	TRUE
20	TRUE	TRUE	TRUE	TRUE	FALSE	TRUE
Correct keypress	18	19	20	18	18	20
False keypress	2	1	0	2	2	0
Succes rate	90	95	100	90	90	100
Average:	94.1667
